# Supplementary material for: Comorbidities in Patients with Autoimmune Bullous Disorders: Hospital-Based Registry Study
Source: MDPI journal article supplement (doi:10.3390/life12040595), 2022-04-18
Supplement: s1 [file s1]

## SUPPLEMENTARY MATERIAL

**Table S1. Diagnostic codes for pemphigus and pemphigoid, International Classification of Diseases, 10th revision (ICD-10)**

| ICD-10 codes          | Diseases                                                                                                                   |
|-----------------------|----------------------------------------------------------------------------------------------------------------------------|
| <b>Pemphigus</b>      |                                                                                                                            |
| <b>L10.0</b>          | Pemphigus vulgaris                                                                                                         |
| <b>L10.1</b>          | Pemphigus vegetans                                                                                                         |
| <b>L10.2</b>          | Pemphigus foliaceus                                                                                                        |
| <b>10.3</b>           | Brazilian pemphigus or fogo selvagem                                                                                       |
| <b>L10.4</b>          | Pemphigus erythematosus                                                                                                    |
| <b>L10.5</b>          | Drug-induced pemphigus                                                                                                     |
| <b>L10.81</b>         | Paraneoplastic pemphigus                                                                                                   |
| <b>L10.89 / L10.8</b> | Other pemphigus                                                                                                            |
| <b>L10.9</b>          | Pemphigus, not specified                                                                                                   |
| <b>Pemphigoid</b>     |                                                                                                                            |
| <b>L12.0</b>          | Bullous pemphigoid                                                                                                         |
| <b>L12.1</b>          | Scarring or mucous membrane pemphigoid                                                                                     |
| <b>L12.2</b>          | Chronic bullous disease of childhood, or linear IgA bullous dermatosis of childhood, or childhood dermatitis herpetiformis |
| <b>L12.3 / L12.30</b> | Acquired epidermolysis bullosa, unspecified                                                                                |
| <b>L12.31</b>         | Epidermolysis bullosa due to drug                                                                                          |
| <b>L12.35</b>         | Other acquired epidermolysis bullosa                                                                                       |
| <b>L12.8</b>          | Other pemphigoid                                                                                                           |
| <b>L12.9</b>          | Pemphigoid, unspecified                                                                                                    |

**Table S2. Diagnostic codes for comorbidities studied in relation to pemphigus and pemphigoid, International Classification of Diseases, 10th revision (ICD-10)**

| <b>Disease</b>                                    | <b>ICD-10 codes</b>                                                                                                                                                                                                                                                                                                                                                                                                                                                                                                                                                                                                                                                             |
|---------------------------------------------------|---------------------------------------------------------------------------------------------------------------------------------------------------------------------------------------------------------------------------------------------------------------------------------------------------------------------------------------------------------------------------------------------------------------------------------------------------------------------------------------------------------------------------------------------------------------------------------------------------------------------------------------------------------------------------------|
| Arterial hypertension                             | I10, I15, I16                                                                                                                                                                                                                                                                                                                                                                                                                                                                                                                                                                                                                                                                   |
| Type 2 diabetes mellitus                          | E11.0, E11.1, E11.9                                                                                                                                                                                                                                                                                                                                                                                                                                                                                                                                                                                                                                                             |
| Type 2 diabetes mellitus with organ complications | E11.2, E11.3, E11.4, E11.5, E11.6, E11.7                                                                                                                                                                                                                                                                                                                                                                                                                                                                                                                                                                                                                                        |
| Ischemic cardiopathy                              | I20-I25                                                                                                                                                                                                                                                                                                                                                                                                                                                                                                                                                                                                                                                                         |
| Heart failure                                     | I50, I50.1, I50.2, I50.3, I50.4, I50.5, I50.6, I50.7, I50.8, I50.9                                                                                                                                                                                                                                                                                                                                                                                                                                                                                                                                                                                                              |
| Peripheral vascular disease                       | I70.90, I73.9, I70.91, I70.92, I70.2                                                                                                                                                                                                                                                                                                                                                                                                                                                                                                                                                                                                                                            |
| Cerebrovascular disease                           | I60 - I69                                                                                                                                                                                                                                                                                                                                                                                                                                                                                                                                                                                                                                                                       |
| Hemiplegia                                        | G81                                                                                                                                                                                                                                                                                                                                                                                                                                                                                                                                                                                                                                                                             |
| Dementia                                          | F01-F04                                                                                                                                                                                                                                                                                                                                                                                                                                                                                                                                                                                                                                                                         |
| Parkinson's disease                               | G20                                                                                                                                                                                                                                                                                                                                                                                                                                                                                                                                                                                                                                                                             |
| Multiple sclerosis                                | G35                                                                                                                                                                                                                                                                                                                                                                                                                                                                                                                                                                                                                                                                             |
| Epilepsy                                          | G40, G40.0, G40.00, G40.001, G40.009, G40.01, G40.011, G40.019, G40.1, G40.10, G40.101, G40.109, G40.11, G40.111, G40.119, G40.2, G40.20, G40.201, G40.209, G40.21, G40.211, G40.219, G40.3, G40.30, G40.301, G40.309, G40.31, G40.311, G40.319, G40.A, G40.A0, G40.A01, G40.A09, G40.A1, G40.A11, G40.A19, G40.B, G40.B0, G40.B01, G40.B09, G40.B1, G40.B11, G40.B19, G40.4, G40.40, G40.401, G40.409, G40.41, G40.411, G40.419, G40.5, G40.50, G40.501, G40.509, G40.8, G40.80, G40.801, G40.802, G40.803, G40.804, G40.81, G40.811, G40.812, G40.813, G40.814, G40.82, G40.821, G40.822, G40.823, G40.824, G40.89, G40.9, G40.90, G40.901, G40.909, G40.91, G40.911, G40.919 |
| Anxiety disorder                                  | F41, F41.0, F41.1, F41.3, F41.8, F41.9                                                                                                                                                                                                                                                                                                                                                                                                                                                                                                                                                                                                                                          |
| Depressive disorder                               | F32, F32.0, F32.1, F32.2, F32.3, F32.4, F32.5, F32.8, F32.9                                                                                                                                                                                                                                                                                                                                                                                                                                                                                                                                                                                                                     |
| Schizophrenia                                     | F20, F20.0, F20.1, F20.2, F20.3, F20.5, F20.8, F20.81, F20.89, F20.9                                                                                                                                                                                                                                                                                                                                                                                                                                                                                                                                                                                                            |
| Psychosis                                         | F22, F23, F28, F29                                                                                                                                                                                                                                                                                                                                                                                                                                                                                                                                                                                                                                                              |
| Bipolar disorder                                  | F31, F31.0, F31.1, F31.10, F31.11, F31.12, F31.13, F31.2, F31.3, F31.30, F31.31, F31.32, F31.4, F31.5, F31.6, F31.60, F31.61, F31.62, F31.63, F31.64, F31.7, F31.70, F31.71, F31.72, F31.73, F31.74, F31.75, F31.76, F31.77, F31.78, F31.8, F31.81, F31.89, F31.9                                                                                                                                                                                                                                                                                                                                                                                                               |
| Rheumatoid arthritis                              | M06.0-M06.9, M05-M05.9                                                                                                                                                                                                                                                                                                                                                                                                                                                                                                                                                                                                                                                          |
| Thyroiditis                                       | E06, E06.0, E06.1, E06.2, E06.3, E06.4, E06.5, E06.9                                                                                                                                                                                                                                                                                                                                                                                                                                                                                                                                                                                                                            |
| Ulcerative colitis                                | K51, K51.0, K51.00, K51.01, K51.011, K51.012, K51.013, K51.014, K51.018, K51.019, K51.2, K51.20, K51.21, K51.211, K51.212, K51.213, K51.214, K51.218, K51.219, K51.3, K51.30, K51.31, K51.311, K51.312, K51.313, K51.314, K51.318, K51.319, K51.4, K51.40, K51.41, K51.411, K51.412, K51.413, K51.414, K51.418, K51.419, K51.5, K51.50, K51.51, K51.511, K51.512, K51.513, K51.514, K51.518, K51.519, K51.8, K51.80, K51.81, K51.811,                                                                                                                                                                                                                                           |

|                                       |                                                                                                                                                                                                                                                                                                                                                                                                                                                                                                                                                                                                                                                                                                                                                                                                                                                                                                                                                                                                                                                                              |
|---------------------------------------|------------------------------------------------------------------------------------------------------------------------------------------------------------------------------------------------------------------------------------------------------------------------------------------------------------------------------------------------------------------------------------------------------------------------------------------------------------------------------------------------------------------------------------------------------------------------------------------------------------------------------------------------------------------------------------------------------------------------------------------------------------------------------------------------------------------------------------------------------------------------------------------------------------------------------------------------------------------------------------------------------------------------------------------------------------------------------|
|                                       | K51.812, K51.813, K51.814, K51.818, K51.819, K51.9, K51.90, K51.91, K51.911, K51.912, K51.913, K51.914, K51.918, K51.919                                                                                                                                                                                                                                                                                                                                                                                                                                                                                                                                                                                                                                                                                                                                                                                                                                                                                                                                                     |
| Type 1 diabetes mellitus              | E10, E10.1, E10.10, E10.11, E10.2, E10.21, E10.21, E10.22, E10.29, E10.3, E10.31, E10.311, E10.319, E10.32, E10.321, E10.3211, E10.3212, E10.3213, E10.3219, E10.329, E10.3291, E10.3292, E10.3293, E10.3299, E10.33, E10.331, E10.3311, E10.3312, E10.3313, E10.3319, E10.339, E10.3391, E10.3392, E10.3393, E10.3399, E10.34, E10.341, E10.3411, E10.3412, E10.3413, E10.3419, E10.349, E10.3491, E10.3492, E10.3493, E10.3499, E10.35, E10.351, E10.3511, E10.3512, E10.3513, E10.3519, E10.352, E10.3521, E10.3522, E10.3523, E10.3529, E10.353, E10.3531, E10.3532, E10.3533, E10.3539, E10.354, E10.3541, E10.3542, E10.3543, E10.3549, E10.355, E10.3551, E10.3552, E10.3553, E10.3559, E10.359, E10.3591, E10.3592, E10.3593, E10.3599, E10.36, E10.37, E10.37X, E10.37X1, E10.37X2, E10.37X3, E10.37X9, E10.39, E10.4, E10.40, E10.41, E10.42, E10.43, E10.44, E10.49, E10.5, E10.51, E10.52, E10.59, E10.6, E10.61, E10.610, E10.618, E10.62, E10.620, E10.621, E10.622, E10.628, E10.63, E10.630, E10.638, E10.64, E10.641, E10.649, E10.65, E10.69, E10.8, E10.9 |
| Celiac disease                        | K90.0                                                                                                                                                                                                                                                                                                                                                                                                                                                                                                                                                                                                                                                                                                                                                                                                                                                                                                                                                                                                                                                                        |
| Asthma                                | J45, J45.2, J45.20, J45.21, J45.22, J45.3, J45.30, J45.31, J45.32, J45.4, J45.40, J45.41, J45.42, J45.5, J45.50, J45.51, J45.52, J45.9, J45.90, J45.901, J45.902, J45.909, J45.99, J45.990, J45.991, J45.998                                                                                                                                                                                                                                                                                                                                                                                                                                                                                                                                                                                                                                                                                                                                                                                                                                                                 |
| Chronic obstructive pulmonary disease | J44                                                                                                                                                                                                                                                                                                                                                                                                                                                                                                                                                                                                                                                                                                                                                                                                                                                                                                                                                                                                                                                                          |
| Connective tissue disease             | M35                                                                                                                                                                                                                                                                                                                                                                                                                                                                                                                                                                                                                                                                                                                                                                                                                                                                                                                                                                                                                                                                          |
| Ulcer disease                         | K25                                                                                                                                                                                                                                                                                                                                                                                                                                                                                                                                                                                                                                                                                                                                                                                                                                                                                                                                                                                                                                                                          |
| Mild liver disease                    | K70.0, K70.9, K71, K73, K75, K76, K77                                                                                                                                                                                                                                                                                                                                                                                                                                                                                                                                                                                                                                                                                                                                                                                                                                                                                                                                                                                                                                        |
| Severe liver disease                  | K70. 2, K70.1, K70.3, K70.4, K74, K74.0-K74.6, K72                                                                                                                                                                                                                                                                                                                                                                                                                                                                                                                                                                                                                                                                                                                                                                                                                                                                                                                                                                                                                           |
| Renal pathology                       | N00-N19                                                                                                                                                                                                                                                                                                                                                                                                                                                                                                                                                                                                                                                                                                                                                                                                                                                                                                                                                                                                                                                                      |
| Neoplasia                             | C00-C76, C80                                                                                                                                                                                                                                                                                                                                                                                                                                                                                                                                                                                                                                                                                                                                                                                                                                                                                                                                                                                                                                                                 |
| Leukemia                              | C91, C92, C93, C94, C95, C96                                                                                                                                                                                                                                                                                                                                                                                                                                                                                                                                                                                                                                                                                                                                                                                                                                                                                                                                                                                                                                                 |
| Malignant lymphoma                    | C81-C88                                                                                                                                                                                                                                                                                                                                                                                                                                                                                                                                                                                                                                                                                                                                                                                                                                                                                                                                                                                                                                                                      |
| Solid metastasis                      | C77-79                                                                                                                                                                                                                                                                                                                                                                                                                                                                                                                                                                                                                                                                                                                                                                                                                                                                                                                                                                                                                                                                       |
| AIDS                                  | B20                                                                                                                                                                                                                                                                                                                                                                                                                                                                                                                                                                                                                                                                                                                                                                                                                                                                                                                                                                                                                                                                          |
| Osteoporosis                          | M81-M81.8, M80-M80.88                                                                                                                                                                                                                                                                                                                                                                                                                                                                                                                                                                                                                                                                                                                                                                                                                                                                                                                                                                                                                                                        |
| Psoriasis                             | L40, L40.1, L40.2, L40.3, L40.4, L40.5, L40.50, L40.51, L40.52, L40.53, L40.54, L40.59, L40.8, L40.9                                                                                                                                                                                                                                                                                                                                                                                                                                                                                                                                                                                                                                                                                                                                                                                                                                                                                                                                                                         |
| Lichen planus                         | L43, L43.0, L43.1, L43.2, L43.3, L43.8, L43.9                                                                                                                                                                                                                                                                                                                                                                                                                                                                                                                                                                                                                                                                                                                                                                                                                                                                                                                                                                                                                                |
